# Supplementary material
Source: HighWire-hosted journal article supplement (https://bmjopen.bmj.com/content/10/6/e036056)
Supplement: inline-supplementary-material-3 [file inline-supplementary-material-3.pdf]

Table S1 | Participant characteristics and their preferences for clinician choosing treatments

| Participant characteristics | Prefer patient choosing<br>(n=235) | Prefer clinician choosing<br>(n=265) | P value |
|-----------------------------|------------------------------------|--------------------------------------|---------|
| <b>Age</b>                  |                                    |                                      |         |
| 65 or above                 | 79 (43%)                           | 103 (57%)                            | 0.261   |
| Below 65                    | 156 (49%)                          | 162 (51%)                            |         |
| <b>Sex</b>                  |                                    |                                      | 0.013   |
| Male                        | 90 (41%)                           | 132 (59%)                            |         |
| Female                      | 145 (52%)                          | 133 (48%)                            |         |
| <b>Race/ethnicity</b>       |                                    |                                      | 0.965   |
| Non-Hispanic whites         | 161 (47%)                          | 180 (53%)                            |         |
| Others                      | 74 (47%)                           | 85 (53%)                             |         |
| <b>Education</b>            |                                    |                                      |         |
| College or more             | 182 (46%)                          | 218 (54%)                            | 0.218   |
| Less than college           | 53 (53%)                           | 47 (47%)                             |         |
| <b>Work status</b>          |                                    |                                      | 0.183   |
| Employed (full/part time)   | 116 (50%)                          | 114 (50%)                            |         |
| Not employed                | 119 (44%)                          | 151 (56%)                            |         |
| <b>Income</b>               |                                    |                                      |         |
| \$35000 or above            | 141 (46%)                          | 168 (54%)                            | 0.492   |
| Below \$35000               | 94 (49%)                           | 97 (51%)                             |         |
| <b>Insurance</b>            |                                    |                                      | 0.352   |
| Have insurance              | 216 (48%)                          | 236 (52%)                            |         |
| No insurance                | 19 (40%)                           | 29 (60%)                             |         |
| <b>Region</b>               |                                    |                                      |         |
| Northeast                   | 36 (42%)                           | 50 (58%)                             | 0.736   |
| South                       | 95 (49%)                           | 99 (51%)                             |         |
| Midwest                     | 54 (47%)                           | 62 (53%)                             |         |
| West                        | 50 (48%)                           | 54 (52%)                             |         |

**Table S2 | Participant characteristics and their preferences for clinician involvement during trial conduct**

| <b>Participant characteristics</b> | <b>Prefer no clinician involvement<br/>(n=226)</b> | <b>Prefer clinician involvement<br/>(n=274)</b> | <b>P value</b> |
|------------------------------------|----------------------------------------------------|-------------------------------------------------|----------------|
| <b>Age</b>                         |                                                    |                                                 |                |
| 65 or above                        | 74 (41%)                                           | 108 (59%)                                       | 0.147          |
| Below 65                           | 152 (48%)                                          | 166 (52%)                                       |                |
| <b>Sex</b>                         |                                                    |                                                 | 0.032          |
| Male                               | 88 (40%)                                           | 134 (60%)                                       |                |
| Female                             | 138 (50%)                                          | 140 (50%)                                       |                |
| <b>Race/ethnicity</b>              |                                                    |                                                 | 0.300          |
| Non-Hispanic whites                | 160 (47%)                                          | 181 (53%)                                       |                |
| Others                             | 66 (42%)                                           | 93 (58%)                                        |                |
| <b>Education</b>                   |                                                    |                                                 |                |
| College or more                    | 176 (44%)                                          | 224 (56%)                                       | 0.334          |
| Less than college                  | 50 (50%)                                           | 50 (50%)                                        |                |
| <b>Work status</b>                 |                                                    |                                                 | 0.124          |
| Employed (full/part time)          | 113 (49%)                                          | 117 (51%)                                       |                |
| Not employed                       | 113 (42%)                                          | 157 (58%)                                       |                |
| <b>Income</b>                      |                                                    |                                                 |                |
| \$35000 or above                   | 135 (44%)                                          | 174 (56%)                                       | 0.441          |
| Below \$35000                      | 91 (48%)                                           | 100 (52%)                                       |                |
| <b>Insurance</b>                   |                                                    |                                                 |                |
| Have insurance                     | 206 (46%)                                          | 246 (54%)                                       | 0.715          |
| No insurance                       | 20 (42%)                                           | 28 (58%)                                        |                |
| <b>Region</b>                      |                                                    |                                                 |                |
| Northeast                          | 34 (40%)                                           | 52 (60%)                                        | 0.671          |
| South                              | 88 (45%)                                           | 106 (55%)                                       |                |
| Midwest                            | 54 (47%)                                           | 62 (53%)                                        |                |
| West                               | 50 (48%)                                           | 54 (52%)                                        |                |

**Table S3 | Participant characteristics and their preferences for treatment types**

| <b>Participant characteristics</b> | <b>Prefer medications<br/>(n=209)</b> | <b>Prefer lifestyle change<br/>(n=123)</b> | <b>Prefer CAM<br/>(n=168)</b> | <b>P value</b> |
|------------------------------------|---------------------------------------|--------------------------------------------|-------------------------------|----------------|
| <b>Age</b>                         |                                       |                                            |                               |                |
| 65 or above                        | 74 (41%)                              | 41 (22%)                                   | 67 (37%)                      | 0.480          |
| Below 65                           | 135 (42%)                             | 82 (26%)                                   | 101 (32%)                     |                |
| <b>Sex</b>                         |                                       |                                            |                               |                |
| Male                               | 118 (53%)                             | 36 (16%)                                   | 68 (31%)                      | <0.001         |
| Female                             | 91 (33%)                              | 87 (31%)                                   | 100 (36%)                     |                |
| <b>Race/ethnicity</b>              |                                       |                                            |                               |                |
| Non-Hispanic whites                | 139 (41%)                             | 77 (22%)                                   | 125 (37%)                     | 0.081          |
| Others                             | 70 (44%)                              | 46 (29%)                                   | 43 (27%)                      |                |
| <b>Education</b>                   |                                       |                                            |                               |                |
| College or more                    | 178 (45%)                             | 100 (25%)                                  | 122 (30%)                     | 0.009          |
| Less than college                  | 31 (31%)                              | 23 (23%)                                   | 46 (46%)                      |                |
| <b>Work status</b>                 |                                       |                                            |                               |                |
| Employed (full/part time)          | 94 (41%)                              | 67 (29%)                                   | 69 (30%)                      | 0.072          |
| Not employed                       | 115 (42%)                             | 56 (21%)                                   | 99 (37%)                      |                |
| <b>Income</b>                      |                                       |                                            |                               |                |
| \$35000 or above                   | 139 (45%)                             | 76 (25%)                                   | 94 (30%)                      | 0.111          |
| Below \$35000                      | 70 (37%)                              | 47 (24%)                                   | 74 (39%)                      |                |
| <b>Insurance</b>                   |                                       |                                            |                               |                |
| Have insurance                     | 191 (42%)                             | 112 (25%)                                  | 149 (33%)                     | 0.650          |
| No insurance                       | 18 (37%)                              | 11 (23%)                                   | 19 (40%)                      |                |
| <b>Region</b>                      |                                       |                                            |                               |                |
| Northeast                          | 38 (44%)                              | 27 (31%)                                   | 21 (25%)                      | 0.362          |
| South                              | 76 (39%)                              | 50 (26%)                                   | 68 (35%)                      |                |
| Midwest                            | 49 (42%)                              | 23 (20%)                                   | 44 (38%)                      |                |
| West                               | 46 (44%)                              | 23 (22%)                                   | 35 (34%)                      |                |

CAM=complementary alternative medicine.

**Table S4 | Participant characteristics and their preferences for daily time commitment to self-tracking**

| <b>Participant characteristics</b> | <b>Prefer 5 minutes daily (n=409)</b> | <b>Prefer 30 minutes daily (n=91)</b> | <b>P value</b> |
|------------------------------------|---------------------------------------|---------------------------------------|----------------|
| <b>Age</b>                         |                                       |                                       |                |
| 65 or above                        | 159 (87%)                             | 23 (13%)                              | 0.020          |
| Below 65                           | 250 (79%)                             | 68 (21%)                              |                |
| <b>Sex</b>                         |                                       |                                       | 0.498          |
| Male                               | 185 (83%)                             | 37 (17%)                              |                |
| Female                             | 224 (81%)                             | 54 (19%)                              |                |
| <b>Race/ethnicity</b>              |                                       |                                       | <0.001         |
| Non-Hispanic whites                | 296 (87%)                             | 45 (13%)                              |                |
| Others                             | 113 (71%)                             | 46 (29%)                              |                |
| <b>Education</b>                   |                                       |                                       |                |
| College or more                    | 327 (82%)                             | 73 (18%)                              | 1.000          |
| Less than college                  | 82 (82%)                              | 18 (18%)                              |                |
| <b>Work status</b>                 |                                       |                                       | 0.123          |
| Employed (full/part time)          | 181 (79%)                             | 49 (21%)                              |                |
| Not employed                       | 228 (84%)                             | 42 (16%)                              |                |
| <b>Income</b>                      |                                       |                                       |                |
| \$35000 or above                   | 246 (80%)                             | 63 (20%)                              | 0.135          |
| Below \$35000                      | 163 (85%)                             | 28 (15%)                              |                |
| <b>Insurance</b>                   |                                       |                                       | 0.096          |
| Have insurance                     | 365 (81%)                             | 87 (19%)                              |                |
| No insurance                       | 44 (92%)                              | 4 (8%)                                |                |
| <b>Region</b>                      |                                       |                                       |                |
| Northeast                          | 71 (83%)                              | 15 (17%)                              | 0.977          |
| South                              | 157 (81%)                             | 37 (19%)                              |                |
| Midwest                            | 96 (83%)                              | 20 (17%)                              |                |
| West                               | 85 (82%)                              | 19 (18%)                              |                |

**Table S5 | Participant characteristics and their preferences for data-collection frequency**

| <b>Participant characteristics</b> | <b>Prefer once daily<br/>(n=422)</b> | <b>Prefer thrice daily<br/>(n=78)</b> | <b>P value</b> |
|------------------------------------|--------------------------------------|---------------------------------------|----------------|
| <b>Age</b>                         |                                      |                                       |                |
| 65 or above                        | 166 (91%)                            | 16 (9%)                               | 0.002          |
| Below 65                           | 256 (81%)                            | 62 (19%)                              |                |
| <b>Sex</b>                         |                                      |                                       |                |
| Male                               | 189 (85%)                            | 33 (15%)                              | 0.779          |
| Female                             | 233 (84%)                            | 45 (16%)                              |                |
| <b>Race/ethnicity</b>              | 303 (89%)                            | 38 (11%)                              | <0.001         |
| Non-Hispanic whites                | 119 (75%)                            | 40 (25%)                              |                |
| Others                             |                                      |                                       |                |
| <b>Education</b>                   |                                      |                                       |                |
| College or more                    | 335 (84%)                            | 65 (16%)                              | 0.518          |
| Less than college                  | 87 (87%)                             | 13 (13%)                              |                |
| <b>Work status</b>                 |                                      |                                       |                |
| Employed (full/part time)          | 179 (78%)                            | 51 (22%)                              | <0.001         |
| Not employed                       | 243 (90%)                            | 27 (10%)                              |                |
| <b>Income</b>                      |                                      |                                       |                |
| \$35000 or above                   | 253 (82%)                            | 56 (18%)                              | 0.064          |
| Below \$35000                      | 169 (88%)                            | 22 (12%)                              |                |
| <b>Insurance</b>                   |                                      |                                       |                |
| Have insurance                     | 377 (83%)                            | 75 (17%)                              | 0.095          |
| No insurance                       | 45 (94%)                             | 3 (6%)                                |                |
| <b>Region</b>                      |                                      |                                       |                |
| Northeast                          | 73 (85%)                             | 13 (15%)                              | 0.958          |
| South                              | 165 (85%)                            | 29 (15%)                              |                |
| Midwest                            | 98 (84%)                             | 18 (16%)                              |                |
| West                               | 86 (83%)                             | 18 (17%)                              |                |

**Table S6 | Participant characteristics and their preferences for study duration**

| <b>Participant characteristics</b> | <b>Prefer 2 weeks<br/>(n=243)</b> | <b>Prefer 12 weeks<br/>(n=257)</b> | <b>P value</b> |
|------------------------------------|-----------------------------------|------------------------------------|----------------|
| <b>Age</b>                         |                                   |                                    |                |
| 65 or above                        | 91 (50%)                          | 91 (50%)                           | 0.703          |
| Below 65                           | 152 (48%)                         | 166 (52%)                          |                |
| <b>Sex</b>                         |                                   |                                    | 0.802          |
| Male                               | 106 (48%)                         | 116 (52%)                          |                |
| Female                             | 137 (49%)                         | 141 (51%)                          |                |
| <b>Race/ethnicity</b>              |                                   |                                    | 0.024          |
| Non-Hispanic whites                | 178 (52%)                         | 163 (48%)                          |                |
| Others                             | 65 (41%)                          | 94 (59%)                           |                |
| <b>Education</b>                   |                                   |                                    |                |
| College or more                    | 188 (47%)                         | 212 (53%)                          | 0.187          |
| Less than college                  | 55 (55%)                          | 45 (45%)                           |                |
| <b>Work status</b>                 |                                   |                                    | 0.397          |
| Employed (full/part time)          | 117 (51%)                         | 113 (49%)                          |                |
| Not employed                       | 126 (47%)                         | 144 (53%)                          |                |
| <b>Income</b>                      |                                   |                                    |                |
| \$35000 or above                   | 150 (49%)                         | 159 (51%)                          | 1.000          |
| Below \$35000                      | 93 (49%)                          | 98 (51%)                           |                |
| <b>Insurance</b>                   |                                   |                                    | 0.958          |
| Have Insurance                     | 219 (48%)                         | 233 (52%)                          |                |
| No Insurance                       | 24 (50%)                          | 24 (50%)                           |                |
| <b>Region</b>                      |                                   |                                    |                |
| Northeast                          | 47 (55%)                          | 39 (45%)                           | 0.250          |
| South                              | 89 (46%)                          | 105 (54%)                          |                |
| Midwest                            | 62 (53%)                          | 54 (47%)                           |                |
| West                               | 45 (43%)                          | 59 (57%)                           |                |

**Table S7 | Participant characteristics and their preferences for bearing out-of-pocket cost (\$100)**

| <b>Participant characteristics</b> | <b>Prefer no cost<br/>(n=441)</b> | <b>Prefer some cost<br/>(n=59)</b> | <b>P value</b> |
|------------------------------------|-----------------------------------|------------------------------------|----------------|
| <b>Age</b>                         |                                   |                                    |                |
| 65 or above                        | 171 (94%)                         | 11 (6%)                            | 0.004          |
| Below 65                           | 270 (85%)                         | 48 (15%)                           |                |
| <b>Sex</b>                         |                                   |                                    | 0.357          |
| Male                               | 192 (86%)                         | 30 (14%)                           |                |
| Female                             | 249 (90%)                         | 29 (10%)                           |                |
| <b>Race/ethnicity</b>              |                                   |                                    | 0.001          |
| Non-Hispanic whites                | 312 (91%)                         | 29 (9%)                            |                |
| Others                             | 129 (81%)                         | 30 (19%)                           |                |
| <b>Education</b>                   |                                   |                                    |                |
| College or more                    | 346 (87%)                         | 54 (13%)                           | 0.029          |
| Less than college                  | 95 (95%)                          | 5 (5%)                             |                |
| <b>Work status</b>                 |                                   |                                    | <0.001         |
| Employed (full/part time)          | 182 (79%)                         | 48 (21%)                           |                |
| Not employed                       | 259 (96%)                         | 11 (4%)                            |                |
| <b>Income</b>                      |                                   |                                    |                |
| \$35000 or above                   | 261 (84%)                         | 48 (16%)                           | 0.002          |
| Below \$35000                      | 180 (94%)                         | 11 (6%)                            |                |
| <b>Insurance</b>                   |                                   |                                    | 0.137          |
| Have Insurance                     | 395 (87%)                         | 57 (13%)                           |                |
| No Insurance                       | 46 (96%)                          | 2 (4%)                             |                |
| <b>Region</b>                      |                                   |                                    |                |
| Northeast                          | 73 (85%)                          | 13 (15%)                           | 0.374          |
| South                              | 177 (91%)                         | 17 (9%)                            |                |
| Midwest                            | 100 (86%)                         | 16 (14%)                           |                |
| West                               | 91 (88%)                          | 13 (12%)                           |                |

**Table S8 | Participant characteristics and their preferences for blinding**

| <b>Participant characteristics</b> | <b>Prefer not blinding<br/>(n=352)</b> | <b>Prefer blinding<br/>(n=148)</b> | <b>P value</b> |
|------------------------------------|----------------------------------------|------------------------------------|----------------|
| <b>Age</b>                         |                                        |                                    |                |
| 65 or above                        | 127 (70%)                              | 55 (30%)                           | 0.898          |
| Below 65                           | 225 (71%)                              | 93 (29%)                           |                |
| <b>Sex</b>                         |                                        |                                    | 0.054          |
| Male                               | 146 (66%)                              | 76 (34%)                           |                |
| Female                             | 206 (74%)                              | 72 (26%)                           |                |
| <b>Race/ethnicity</b>              |                                        |                                    | 0.242          |
| Non-Hispanic whites                | 234 (69%)                              | 107 (31%)                          |                |
| Others                             | 118 (74%)                              | 41 (26%)                           |                |
| <b>Education</b>                   | 275 (69%)                              | 125 (31%)                          | 0.135          |
| College or more                    | 77 (77%)                               | 23 (23%)                           |                |
| Less than college                  |                                        |                                    |                |
| <b>Work status</b>                 |                                        |                                    | 0.780          |
| Employed (full/part time)          | 160 (70%)                              | 70 (30%)                           |                |
| Not employed                       | 192 (71%)                              | 78 (29%)                           |                |
| <b>Income</b>                      |                                        |                                    | 0.994          |
| \$35000 or above                   | 217 (70%)                              | 92 (30%)                           |                |
| Below \$35000                      | 135 (71%)                              | 56 (29%)                           |                |
| <b>Insurance</b>                   | 323 (71%)                              | 129 (29%)                          | 0.154          |
| Have insurance                     | 29 (60%)                               | 19 (40%)                           |                |
| No insurance                       |                                        |                                    |                |
| <b>Region</b>                      |                                        |                                    | 0.271          |
| Northeast                          | 64 (74%)                               | 22 (26%)                           |                |
| South                              | 142 (73%)                              | 52 (27%)                           |                |
| Midwest                            | 80 (69%)                               | 36 (31%)                           |                |
| West                               | 66 (63%)                               | 38 (37%)                           |                |



Table S9 | Patient conditions and their preferences for clinician choosing treatments

| Patient conditions    | Prefer patient choosing (n=235) | Prefer clinician choosing (n=265) | P value |
|-----------------------|---------------------------------|-----------------------------------|---------|
| <b>Joint pain</b>     |                                 |                                   | 0.308   |
| No diagnosis          | 129 (45%)                       | 156 (55%)                         |         |
| Not interested in PT  | 36 (44%)                        | 46 (56%)                          |         |
| Very interested in PT | 70 (53%)                        | 63 (47%)                          |         |
| <b>Asthma</b>         |                                 |                                   | 0.146   |
| No diagnosis          | 155 (44%)                       | 196 (56%)                         |         |
| Not interested in PT  | 43 (54%)                        | 36 (46%)                          |         |
| Very interested in PT | 37 (53%)                        | 33 (47%)                          |         |
| <b>Back pain</b>      |                                 |                                   | 0.358   |
| No diagnosis          | 145 (45%)                       | 178 (55%)                         |         |
| Not interested in PT  | 37 (48%)                        | 40 (52%)                          |         |
| Very interested in PT | 53 (53%)                        | 47 (47%)                          |         |
| <b>Depression</b>     |                                 |                                   | 0.049   |
| No diagnosis          | 128 (44%)                       | 162 (56%)                         |         |
| Not interested in PT  | 48 (44%)                        | 60 (56%)                          |         |
| Very interested in PT | 59 (58%)                        | 43 (42%)                          |         |
| <b>Diabetes</b>       |                                 |                                   | 0.039   |
| No diagnosis          | 162 (51%)                       | 158 (49%)                         |         |
| Not interested in PT  | 24 (34%)                        | 46 (66%)                          |         |
| Very interested in PT | 49 (45%)                        | 61 (55%)                          |         |
| <b>Hypertension</b>   |                                 |                                   | 0.072   |
| No diagnosis          | 66 (51%)                        | 63 (49%)                          |         |
| Not interested in PT  | 81(41%)                         | 118 (59%)                         |         |
| Very interested in PT | 88 (51%)                        | 84 (49%)                          |         |
| <b>Hyperlipidemia</b> |                                 |                                   | 0.022   |
| No diagnosis          | 120 (52%)                       | 110 (48%)                         |         |
| Not interested in PT  | 55 (38%)                        | 91 (62%)                          |         |
| Very interested in PT | 60 (48%)                        | 64 (52%)                          |         |
| <b>Insomnia</b>       |                                 |                                   | 0.562   |
| No diagnosis          | 173 (46%)                       | 206 (54%)                         |         |
| Not interested in PT  | 21 (51%)                        | 20 (49%)                          |         |
| Very interested in PT | 41 (51%)                        | 39 (49%)                          |         |

PT=Personalized Trial

**Table S10. Patient conditions and their preferences for clinician involvement during trial conduct**

| <b>Patient conditions</b> | <b>Prefer no doctor involvement<br/>(n=226)</b> | <b>Prefer doctor involvement<br/>(n=274)</b> | <b>P value</b> |
|---------------------------|-------------------------------------------------|----------------------------------------------|----------------|
| <b>Joint pain</b>         |                                                 |                                              |                |
| No diagnosis              | 124 (44%)                                       | 161 (56%)                                    | 0.372          |
| Not interested in PT      | 35 (43%)                                        | 47 (57%)                                     |                |
| Very interested in PT     | 67 (50%)                                        | 66 (50%)                                     |                |
| <b>Asthma</b>             |                                                 |                                              |                |
| No diagnosis              | 145 (41%)                                       | 206 (59%)                                    | 0.027          |
| Not interested in PT      | 43 (54%)                                        | 36 (46%)                                     |                |
| Very interested in PT     | 38 (54%)                                        | 32 (46%)                                     |                |
| <b>Back pain</b>          |                                                 |                                              |                |
| No diagnosis              | 138 (43%)                                       | 185 (57%)                                    | 0.300          |
| Not interested in PT      | 37 (48%)                                        | 40 (52%)                                     |                |
| Very interested in PT     | 51 (51%)                                        | 49 (49%)                                     |                |
| <b>Depression</b>         |                                                 |                                              |                |
| No diagnosis              | 123 (42%)                                       | 167 (58%)                                    | 0.052          |
| Not interested in PT      | 46 (43%)                                        | 62 (57%)                                     |                |
| Very interested in PT     | 57 (56%)                                        | 45 (44%)                                     |                |
| <b>Diabetes</b>           |                                                 |                                              |                |
| No diagnosis              | 159 (50%)                                       | 161 (50%)                                    | 0.022          |
| Not interested in PT      | 24 (34%)                                        | 46 (66%)                                     |                |
| Very interested in PT     | 43 (39%)                                        | 67 (61%)                                     |                |
| <b>Hypertension</b>       |                                                 |                                              |                |
| No diagnosis              | 64 (50%)                                        | 65 (50%)                                     | 0.129          |
| Not interested in PT      | 79 (40%)                                        | 120 (60%)                                    |                |
| Very interested in PT     | 83 (48%)                                        | 89 (52%)                                     |                |
| <b>Hyperlipidemia</b>     |                                                 |                                              |                |
| No diagnosis              | 113 (49%)                                       | 117 (51%)                                    | 0.121          |
| Not interested in PT      | 56 (38%)                                        | 90 (62%)                                     |                |
| Very interested in PT     | 57 (46%)                                        | 67 (54%)                                     |                |
| <b>Insomnia</b>           |                                                 |                                              |                |
| No diagnosis              | 164 (43%)                                       | 215 (57%)                                    | 0.287          |
| Not interested in PT      | 22 (54%)                                        | 19 (46%)                                     |                |
| Very interested in PT     | 40 (50%)                                        | 40 (50%)                                     |                |

PT=Personalized Trial

**Table S11 | Patient conditions and their preferences for treatment types**

| <b>Patient conditions</b> | <b>Prefer medications<br/>(n=209)</b> | <b>Prefer lifestyle<br/>(n=123)</b> | <b>Prefer CAM<br/>(n=168)</b> | <b>P value</b> |
|---------------------------|---------------------------------------|-------------------------------------|-------------------------------|----------------|
| <b>Joint pain</b>         |                                       |                                     |                               |                |
| No diagnosis              | 119 (42%)                             | 77 (27%)                            | 89 (31%)                      | 0.133          |
| Not interested in PT      | 27 (33%)                              | 21 (26%)                            | 34 (41%)                      |                |
| Very interested in PT     | 63 (47%)                              | 25 (19%)                            | 45 (34%)                      |                |
| <b>Asthma</b>             |                                       |                                     |                               |                |
| No diagnosis              | 143 (41%)                             | 86 (24%)                            | 122 (35%)                     | 0.182          |
| Not interested in PT      | 28 (35%)                              | 23 (30%)                            | 28 (35%)                      |                |
| Very interested in PT     | 38 (54%)                              | 14 (20%)                            | 18 (26%)                      |                |
| <b>Back pain</b>          |                                       |                                     |                               |                |
| No diagnosis              | 134 (41%)                             | 81 (25%)                            | 108 (34%)                     | 0.940          |
| Not interested in PT      | 30 (39%)                              | 19 (25%)                            | 28 (36%)                      |                |
| Very interested in PT     | 45 (45%)                              | 23 (23%)                            | 32 (32%)                      |                |
| <b>Depression</b>         |                                       |                                     |                               |                |
| No diagnosis              | 115 (40%)                             | 71 (24%)                            | 104 (36%)                     | 0.768          |
| Not interested in PT      | 48 (44%)                              | 27 (25%)                            | 33 (31%)                      |                |
| Very interested in PT     | 46 (45%)                              | 25 (25%)                            | 31 (30%)                      |                |
| <b>Diabetes</b>           |                                       |                                     |                               |                |
| No diagnosis              | 117 (36%)                             | 92 (29%)                            | 111 (35%)                     | 0.002          |
| Not interested in PT      | 29 (41%)                              | 13 (19%)                            | 28 (40%)                      |                |
| Very interested in PT     | 63 (57%)                              | 18 (16%)                            | 29 (27%)                      |                |
| <b>Hypertension</b>       |                                       |                                     |                               |                |
| No diagnosis              | 51 (40%)                              | 38 (29%)                            | 40 (31%)                      | 0.564          |
| Not interested in PT      | 81 (41%)                              | 46 (23%)                            | 72 (36%)                      |                |
| Very interested in PT     | 77 (45%)                              | 39 (23%)                            | 56 (32%)                      |                |
| <b>Hyperlipidemia</b>     |                                       |                                     |                               |                |
| No diagnosis              | 88 (38%)                              | 57 (25%)                            | 85 (37%)                      | 0.331          |
| Not interested in PT      | 61 (42%)                              | 35 (24%)                            | 50 (34%)                      |                |
| Very interested in PT     | 60 (48%)                              | 31 (25%)                            | 33 (27%)                      |                |
| <b>Insomnia</b>           |                                       |                                     |                               |                |
| No diagnosis              | 150 (40%)                             | 96 (25%)                            | 133 (35%)                     | 0.083          |
| Not interested in PT      | 16 (39%)                              | 14 (34%)                            | 11 (27%)                      |                |

|                       |          |          |          |
|-----------------------|----------|----------|----------|
| Very interested in PT | 43 (54%) | 13 (16%) | 24 (30%) |
|-----------------------|----------|----------|----------|

CAM=complementary alternative medicine; PT=Personalized Trial

**Table S12 | Patient conditions and their preferences for daily time commitment to self-tracking**

| Patient conditions    | Prefer 5 minutes daily (n=409) | Prefer 30 minutes daily (n=91) | P value |
|-----------------------|--------------------------------|--------------------------------|---------|
| <b>Joint pain</b>     |                                |                                |         |
| No diagnosis          | 225 (79%)                      | 60 (21%)                       | 0.096   |
| Not interested in PT  | 73 (89%)                       | 9 (11%)                        |         |
| Very interested in PT | 111 (83%)                      | 22 (17%)                       |         |
| <b>Asthma</b>         |                                |                                |         |
| No diagnosis          | 296 (84%)                      | 55 (16%)                       | 0.054   |
| Not interested in PT  | 62 (78%)                       | 17 (22%)                       |         |
| Very interested in PT | 51 (73%)                       | 19 (27%)                       |         |
| <b>Back pain</b>      |                                |                                |         |
| No diagnosis          | 266 (82%)                      | 57 (18%)                       | 0.868   |
| Not interested in PT  | 63 (82%)                       | 14 (18%)                       |         |
| Very interested in PT | 80 (80%)                       | 20 (20%)                       |         |
| <b>Depression</b>     |                                |                                |         |
| No diagnosis          | 241 (83%)                      | 49 (17%)                       | 0.668   |
| Not interested in PT  | 86 (80%)                       | 22 (20%)                       |         |
| Very interested in PT | 82 (80%)                       | 20 (20%)                       |         |
| <b>Diabetes</b>       |                                |                                |         |
| No diagnosis          | 266 (83%)                      | 54 (17%)                       | 0.061   |
| Not interested in PT  | 61 (87%)                       | 9 (13%)                        |         |
| Very interested in PT | 82 (75%)                       | 28 (25%)                       |         |
| <b>Hypertension</b>   |                                |                                |         |
| No diagnosis          | 100 (78%)                      | 29 (22%)                       | 0.285   |
| Not interested in PT  | 168 (84%)                      | 31 (16%)                       |         |
| Very interested in PT | 141 (82%)                      | 31 (18%)                       |         |
| <b>Hyperlipidemia</b> |                                |                                |         |
| No diagnosis          | 186 (81%)                      | 44 (19%)                       | 0.876   |
| Not interested in PT  | 121 (83%)                      | 25 (17%)                       |         |
| Very interested in PT | 102 (82%)                      | 22 (18%)                       |         |
| <b>Insomnia</b>       |                                |                                |         |
| No diagnosis          | 307 (81%)                      | 72 (19%)                       | 0.699   |

|                       |          |          |
|-----------------------|----------|----------|
| Not interested in PT  | 35 (85%) | 6 (15%)  |
| Very interested in PT | 67 (84%) | 13 (16%) |

---

PT=Personalized Trial

**Table S13 | Patient conditions and their preferences for data-collection frequency**

| Patient conditions    | Prefer once daily<br>(n=422) | Prefer thrice daily<br>(n=78) | P value |
|-----------------------|------------------------------|-------------------------------|---------|
| <b>Joint pain</b>     |                              |                               |         |
| No diagnosis          | 233 (82%)                    | 52 (18%)                      | 0.091   |
| Not interested in PT  | 75 (91%)                     | 7 (9%)                        |         |
| Very interested in PT | 114 (86%)                    | 19 (14%)                      |         |
| <b>Asthma</b>         |                              |                               |         |
| No diagnosis          | 308 (88%)                    | 43 (12%)                      | 0.002   |
| Not interested in PT  | 64 (81%)                     | 15 (19%)                      |         |
| Very interested in PT | 50 (71%)                     | 20 (29%)                      |         |
| <b>Back pain</b>      |                              |                               |         |
| No diagnosis          | 269 (83%)                    | 54 (17%)                      | 0.385   |
| Not interested in PT  | 69 (90%)                     | 8 (10%)                       |         |
| Very interested in PT | 84 (84%)                     | 16 (16%)                      |         |
| <b>Depression</b>     |                              |                               |         |
| No diagnosis          | 254 (88%)                    | 36 (12%)                      | 0.027   |
| Not interested in PT  | 90 (83%)                     | 18 (17%)                      |         |
| Very interested in PT | 78 (76%)                     | 24 (24%)                      |         |
| <b>Diabetes</b>       |                              |                               |         |
| No diagnosis          | 273 (85%)                    | 47 (15%)                      | 0.078   |
| Not interested in PT  | 63 (90%)                     | 7 (10%)                       |         |
| Very interested in PT | 86 (78%)                     | 24 (22%)                      |         |
| <b>Hypertension</b>   |                              |                               |         |
| No diagnosis          | 99 (77%)                     | 30 (23%)                      | 0.015   |
| Not interested in PT  | 176 (88%)                    | 23 (12%)                      |         |
| Very interested in PT | 147 (85%)                    | 25 (15%)                      |         |
| <b>Hyperlipidemia</b> |                              |                               |         |
| No diagnosis          | 188 (82%)                    | 42 (18%)                      | 0.161   |
| Not interested in PT  | 130 (89%)                    | 16 (11%)                      |         |
| Very interested in PT | 104 (84%)                    | 20 (16%)                      |         |
| <b>Insomnia</b>       |                              |                               | 0.453   |

|                       |           |          |
|-----------------------|-----------|----------|
| No diagnosis          | 324 (85%) | 55 (15%) |
| Not interested in PT  | 34 (83%)  | 7 (17%)  |
| Very interested in PT | 64 (80%)  | 16 (20%) |

PT=Personalized Trial

**Table S14 | Patient conditions and their preferences for study duration**

| Patient conditions    | Prefer 2 weeks<br>(n = 243) | Prefer 12 weeks<br>(n = 257) | P value |
|-----------------------|-----------------------------|------------------------------|---------|
| <b>Joint pain</b>     |                             |                              |         |
| No diagnosis          | 148 (52%)                   | 137 (48%)                    | <0.001  |
| Not interested in PT  | 49 (60%)                    | 33 (40%)                     |         |
| Very interested in PT | 46 (35%)                    | 87 (65%)                     |         |
| <b>Asthma</b>         |                             |                              |         |
| No diagnosis          | 167 (48%)                   | 184 (52%)                    | 0.761   |
| Not interested in PT  | 41 (52%)                    | 38 (48%)                     |         |
| Very interested in PT | 35 (50%)                    | 35 (50%)                     |         |
| <b>Back pain</b>      |                             |                              |         |
| No diagnosis          | 158 (49%)                   | 165 (51%)                    | 0.001   |
| Not interested in PT  | 49 (64%)                    | 28 (36%)                     |         |
| Very interested in PT | 36 (36%)                    | 64 (64%)                     |         |
| <b>Depression</b>     |                             |                              |         |
| No diagnosis          | 148 (51%)                   | 142 (49%)                    | 0.161   |
| Not interested in PT  | 54 (50%)                    | 54 (50%)                     |         |
| Very interested in PT | 41 (40%)                    | 61 (60%)                     |         |
| <b>Diabetes</b>       |                             |                              |         |
| No diagnosis          | 157 (49%)                   | 163 (51%)                    | 0.860   |
| Not interested in PT  | 35 (50%)                    | 35 (50%)                     |         |
| Very interested in PT | 51 (46%)                    | 59 (54%)                     |         |
| <b>Hypertension</b>   |                             |                              |         |
| No diagnosis          | 68 (53%)                    | 61 (47%)                     | 0.555   |
| Not interested in PT  | 94 (47%)                    | 105 (53%)                    |         |
| Very interested in PT | 81 (47%)                    | 91 (53%)                     |         |
| <b>Hyperlipidemia</b> |                             |                              |         |
| No diagnosis          | 108 (47%)                   | 122 (53%)                    | 0.771   |
| Not interested in PT  | 72 (49%)                    | 74 (51%)                     |         |
| Very interested in PT | 63 (51%)                    | 61 (49%)                     |         |

|                       |           |           |       |
|-----------------------|-----------|-----------|-------|
| <b>Insomnia</b>       |           |           | 0.316 |
| No diagnosis          | 191 (50%) | 188 (50%) |       |
| Not interested in PT  | 19 (46%)  | 22 (54%)  |       |
| Very interested in PT | 33 (41%)  | 47 (59%)  |       |

PT=Personalized Trial

**Table S15 | Patient conditions and their preferences for bearing out-of-pocket cost (\$100)**

| Patient conditions    | Prefer no cost<br>(n=441) | Prefer some cost<br>(n=59) | P value |
|-----------------------|---------------------------|----------------------------|---------|
| <b>Joint pain</b>     |                           |                            |         |
| No diagnosis          | 242 (85%)                 | 43 (15%)                   | 0.032   |
| Not interested in PT  | 76 (93%)                  | 6 (7%)                     |         |
| Very interested in PT | 123 (92%)                 | 10 (8%)                    |         |
| <b>Asthma</b>         |                           |                            |         |
| No diagnosis          | 319 (91%)                 | 32 (9%)                    | 0.014   |
| Not interested in PT  | 66 (84%)                  | 13 (16%)                   |         |
| Very interested in PT | 56 (80%)                  | 14 (20%)                   |         |
| <b>Back pain</b>      |                           |                            | 0.232   |
| No diagnosis          | 280 (87%)                 | 43 (13%)                   |         |
| Not interested in PT  | 68 (88%)                  | 9 (12%)                    |         |
| Very interested in PT | 93 (93%)                  | 7 (7%)                     |         |
| <b>Depression</b>     |                           |                            | 0.071   |
| No diagnosis          | 263 (91%)                 | 27 (9%)                    |         |
| Not interested in PT  | 89 (82%)                  | 19 (18%)                   |         |
| Very interested in PT | 89 (87%)                  | 13 (13%)                   |         |
| <b>Diabetes</b>       |                           |                            | 0.596   |
| No diagnosis          | 285 (89%)                 | 35 (11%)                   |         |
| Not interested in PT  | 62 (89%)                  | 8 (11%)                    |         |
| Very interested in PT | 94 (85%)                  | 16 (15%)                   |         |
| <b>Hypertension</b>   |                           |                            | <0.001  |
| No diagnosis          | 102 (79%)                 | 27 (21%)                   |         |
| Not interested in PT  | 179 (90%)                 | 20 (10%)                   |         |
| Very interested in PT | 160 (93%)                 | 12 (7%)                    |         |
| <b>Hyperlipidemia</b> |                           |                            | 0.349   |
| No diagnosis          | 198 (86%)                 | 32 (14%)                   |         |
| Not interested in PT  | 130 (89%)                 | 16 (11%)                   |         |
| Very interested in PT | 113 (91%)                 | 11 (9%)                    |         |

|                       |           |          |       |
|-----------------------|-----------|----------|-------|
| <b>Insomnia</b>       |           |          | 0.984 |
| No diagnosis          | 334 (88%) | 45 (12%) |       |
| Not interested in PT  | 36 (88%)  | 5 (12%)  |       |
| Very interested in PT | 71 (89%)  | 9 (11%)  |       |

PT=Personalized Trial

**Table S16 | Patient conditions and their preferences for blinding**

| Patient conditions    | Prefer not blinding<br>(n=352) | Prefer blinding<br>(n=48) | P value |
|-----------------------|--------------------------------|---------------------------|---------|
| <b>Joint pain</b>     |                                |                           | 0.726   |
| No diagnosis          | 204 (72%)                      | 81 (28%)                  |         |
| Not interested in PT  | 55 (67%)                       | 27 (33%)                  |         |
| Very interested in PT | 93 (70%)                       | 40 (30%)                  |         |
| <b>Asthma</b>         |                                |                           | 0.121   |
| No diagnosis          | 253 (72%)                      | 98 (28%)                  |         |
| Not interested in PT  | 57 (72%)                       | 22 (28%)                  |         |
| Very interested in PT | 42 (60%)                       | 28 (40%)                  |         |
| <b>Back pain</b>      |                                |                           | 0.515   |
| No diagnosis          | 233 (72%)                      | 90 (28%)                  |         |
| Not interested in PT  | 52 (68%)                       | 25 (32%)                  |         |
| Very interested in PT | 67 (67%)                       | 33 (33%)                  |         |
| <b>Depression</b>     |                                |                           | 0.272   |
| No diagnosis          | 202 (70%)                      | 88 (30%)                  |         |
| Not interested in PT  | 72 (67%)                       | 36 (33%)                  |         |
| Very interested in PT | 78 (76%)                       | 24 (24%)                  |         |
| <b>Diabetes</b>       |                                |                           | 0.353   |
| No diagnosis          | 234 (73%)                      | 88 (27%)                  |         |
| Not interested in PT  | 48 (69%)                       | 22 (31%)                  |         |
| Very interested in PT | 72 (65%)                       | 38 (35%)                  |         |
| <b>Hypertension</b>   |                                |                           | 0.973   |
| No diagnosis          | 91 (71%)                       | 38 (29%)                  |         |
| Not interested in PT  | 141 (71%)                      | 58 (29%)                  |         |
| Very interested in PT | 120 (70%)                      | 52 (30%)                  |         |
| <b>Hyperlipidemia</b> |                                |                           | 0.755   |
| No diagnosis          | 161 (70%)                      | 69 (30%)                  |         |
| Not interested in PT  | 106 (73%)                      | 40 (27%)                  |         |



|                       |           |           |       |
|-----------------------|-----------|-----------|-------|
| Very interested in PT | 85 (69%)  | 39 (31%)  | 0.764 |
| <b>Insomnia</b>       |           |           |       |
| No diagnosis          | 270 (71%) | 109 (29%) |       |
| Not interested in PT  | 28 (68%)  | 13 (32%)  |       |
| Very interested in PT | 54 (68%)  | 26 (32%)  |       |

---

PT=Personalized Trial
